# Supplementary material for: Diversity of Mycobacterium tuberculosis across Evolutionary Scales
Source: PubMed Central journal article supplement (PMC4642946; doi:10.1371/journal.ppat.1005257), 2015-11-12
Supplement: ppat.1005257.s003.pdf [file ppat.1005257.s003.pdf]

| Population          |          | $\pi$        |              |            | $\theta$     |              |            |
|---------------------|----------|--------------|--------------|------------|--------------|--------------|------------|
| <b>Between-host</b> |          | <b>GATK</b>  |              |            | <b>GATK</b>  |              |            |
| <i>n</i>            |          |              |              |            |              |              |            |
| Global              | 201      | 2.34E-04     |              |            | 1.01E-03     |              |            |
| Lineage 2           | 37       | 5.37E-05     |              |            | 1.59E-04     |              |            |
| Lineage 4           | 53       | 1.19E-04     |              |            | 3.39E-04     |              |            |
| <b>Within-host</b>  |          | <b>mbq20</b> | <b>mbq30</b> | <b>mc3</b> | <b>mbq20</b> | <b>mbq30</b> | <b>mc3</b> |
| Patient A           |          |              |              |            |              |              |            |
|                     | 0 month  | 1.87E-05     | NA           | 3.33E-06   | 5.92E-05     | NA           | 5.24E-06   |
|                     | 19 month | 2.96E-05     | 5.88E-06     | 5.39E-06   | 9.65E-05     | 1.35E-05     | 1.18E-05   |
|                     | 24 month | 4.43E-05     | 1.82E-05     | 1.96E-05   | 1.23E-04     | 4.32E-05     | 3.91E-05   |
| Patient B           |          |              |              |            |              |              |            |
|                     | 35 month | 4.90E-04     | 4.96E-04     | 3.23E-05   | 1.69E-03     | 1.72E-03     | 7.91E-05   |
| Patient C           |          |              |              |            |              |              |            |
|                     | -1 month | 6.94E-05     | 1.17E-05     | 2.11E-05   | 2.10E-04     | 2.63E-05     | 4.29E-05   |
|                     | 11 month | 4.99E-04     | 5.66E-04     | 2.21E-05   | 1.73E-03     | 1.97E-03     | 5.72E-05   |
| Patient D           |          |              |              |            |              |              |            |
|                     | 0 month  | 1.75E-05     | 6.51E-06     | 8.53E-06   | 4.77E-05     | 1.66E-05     | 1.75E-05   |
|                     | 9 month  | 2.06E-05     | 8.09E-06     | 1.15E-05   | 5.36E-05     | 2.05E-05     | 2.31E-05   |
|                     | 11 month | 3.39E-05     | 1.34E-05     | 1.85E-05   | 8.91E-05     | 3.53E-05     | 3.76E-05   |
|                     | 20 month | 1.48E-05     | 6.00E-06     | 6.67E-06   | 4.18E-05     | 1.64E-05     | 1.41E-05   |
| Patient E           |          |              |              |            |              |              |            |
|                     | 0 month  | 2.53E-05     | 1.99E-05     | 2.09E-06   | 8.56E-05     | 6.69E-05     | 3.60E-06   |
|                     | 8 month  | 2.40E-05     | 1.88E-05     | 1.87E-06   | 8.17E-05     | 6.35E-05     | 3.54E-06   |
|                     | 12 month | 2.63E-05     | 2.00E-05     | 1.96E-06   | 8.99E-05     | 6.82E-05     | 4.02E-06   |
|                     | 14 month | 2.48E-05     | 1.85E-05     | 2.28E-06   | 8.37E-05     | 6.25E-05     | 4.34E-06   |
|                     | 28 month | 2.63E-05     | 2.00E-05     | 2.85E-06   | 8.68E-05     | 6.49E-05     | 4.05E-06   |
|                     | 31 month | 2.71E-05     | 2.17E-05     | 2.91E-06   | 8.98E-05     | 7.09E-05     | 4.44E-06   |
|                     | 34 month | 2.43E-05     | 1.88E-05     | 2.67E-06   | 8.06E-05     | 6.14E-05     | 4.39E-06   |
|                     | 39 month | 2.35E-05     | 1.74E-05     | 2.47E-06   | 7.81E-05     | 5.72E-05     | 3.86E-06   |
|                     | 42 month | 2.39E-05     | 1.81E-05     | 2.27E-06   | 7.97E-05     | 6.02E-05     | 3.42E-06   |
